# Supplementary material for: Characterization of a TUTase/RNase complex required for Drosophila gametogenesis
Source: PubMed Central journal article supplement — RNA. 2017 Mar;23(3):284–96. doi: 10.1261/rna.059527.116 (PMC5311484; doi:10.1261/rna.059527.116), 2017-03
Supplement: supp_059527.116_Supplemental_Material.pdf [file supp_059527.116_Supplemental_Material.pdf]

Lin et al, Characterization of a TUTase/nuclease complex required for *Drosophila* gametogenesis

#### Supplementary Figures and Tables

Figure S1. Domain comparison of Dis3L2 orthologs.

Figure S2. Tailor associates with Dis3L2 via Tailor N-terminal domains.

Figure S3. Figure S2. Developmental and tissue-specific expression of *Tailor* and *Dis3L2*.

Figure S4. CRISPR mutagenesis of *Drosophila Dis3L2*.

Figure S5. Analysis of germline stem cells in *Tailor*, *Dis3L2* and double mutant testes.

Figure S6. Testis defects of *Dis3L2[SK5]* homozygous mutants.

Figure S7. PCA analysis of *Tailor*, *Dis3L2* and double mutant testes RNA-seq data.

Figure S8. Venn diagrams summarizing shared changes amongst the *Tailor* and *Dis3L2* mutant datasets.

Figure S9. MA expression plots of lncRNA changes in *Tailor*, *Dis3L2* and double mutant testis.

Figure S10. Heatmaps of lncRNA clusters that are coordinately upregulated in *Tailor*, *Dis3L2*, or double mutants.

Table S1. Statistics for total RNA-seq data produced in this study.

Table S2. Primer sequences for cloning and in vitro assays.

CG16940/D-Dis3L2

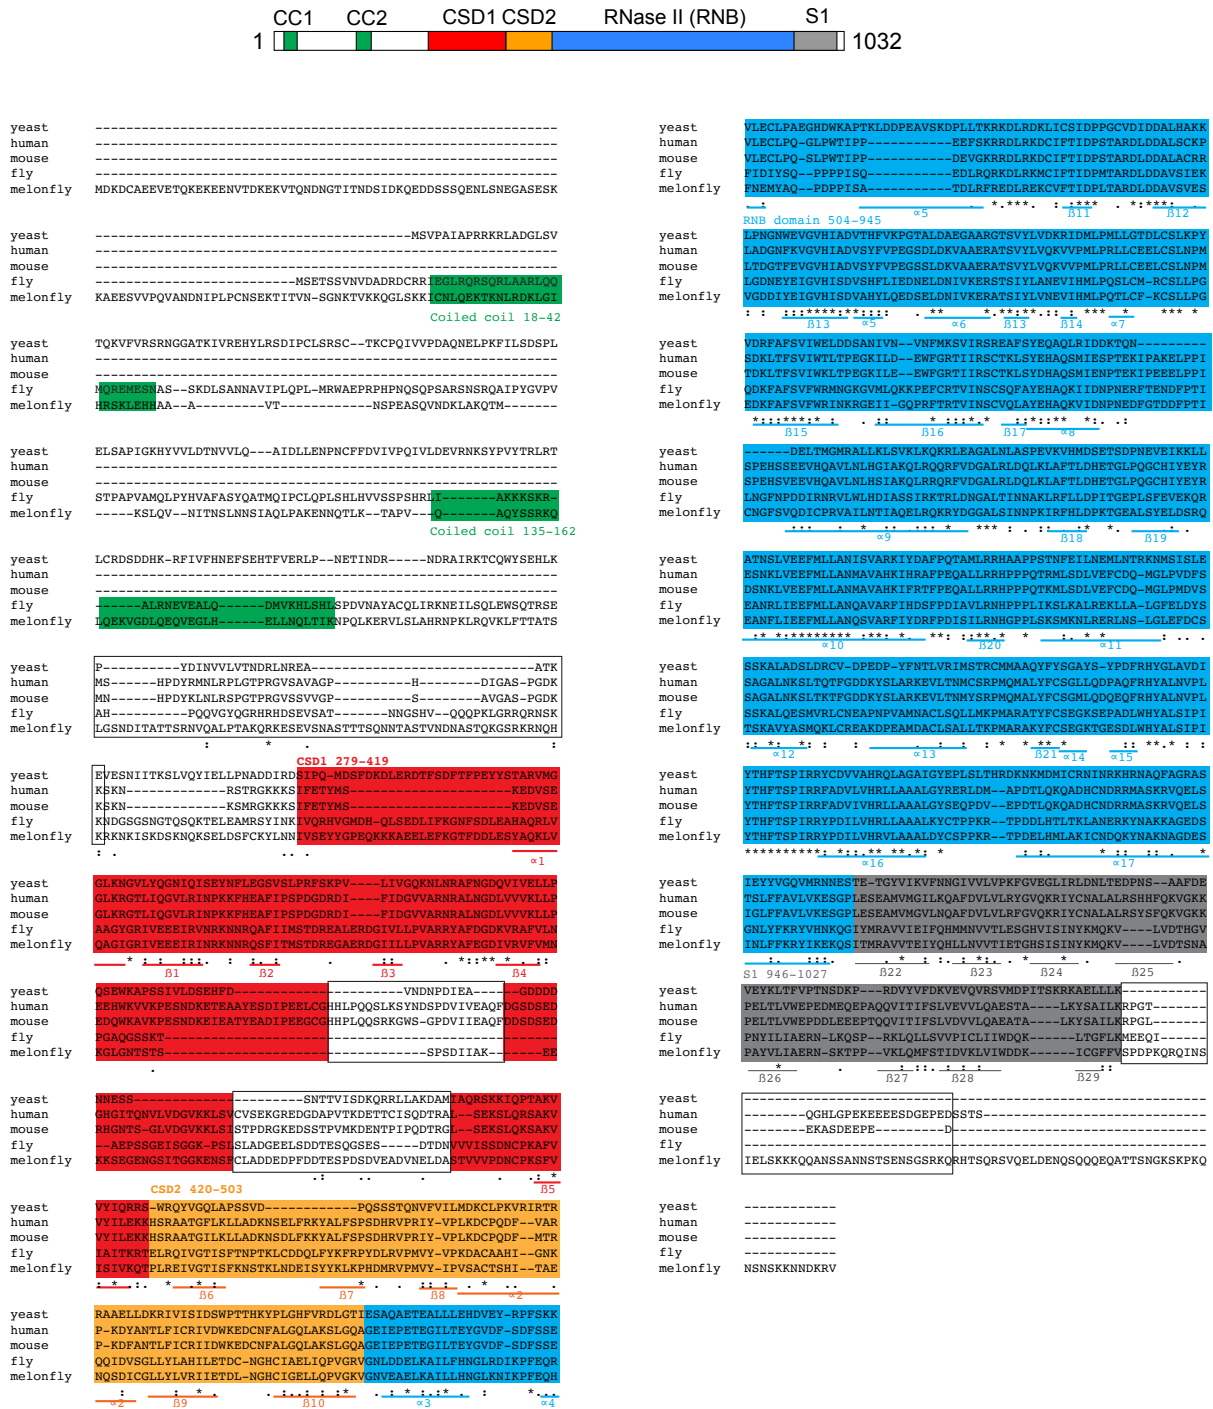

Figure S1. Domain comparison of Dis3L2 orthologs

The murine Dis3L2 structure (Faehnle, 2014) was used as a reference for structural modeling. The segments boxed in black were truncated in the crystallization study. All the domains shown are annotated according to sequence similarity as well as similar organization of alpha helices and beta sheets. Of note, the two cold shock domains (CSDs) found in other Dis3L2 orthologs were not predicted in fly CG16940 by several annotation servers, but the structural modeling provides support for their existence in CG16940. Dipteran Dis3L2 factors also contain N-terminal coiled-coil (CC) domains that are not shared by other species.

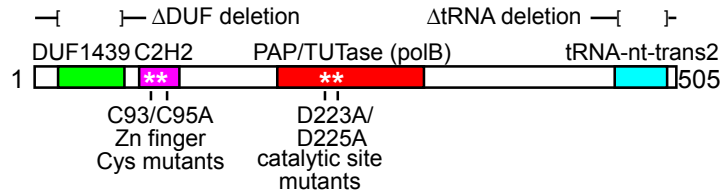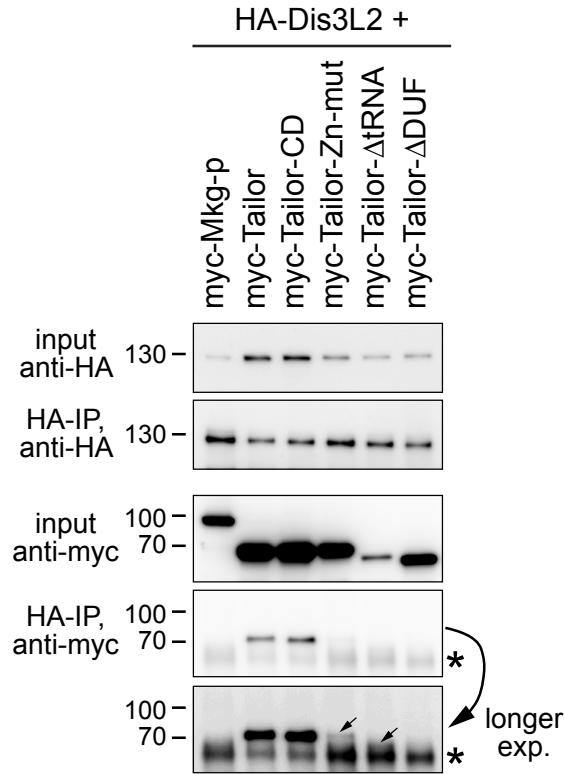

Figure S2. Tailor associates with Dis3L2 via Tailor N-terminal domains.

(A) Summary of Tailor domain structure and mutant variants analyzed in co-immunoprecipitation (co-IP) assays. (B) S2 cells were transfected with HA-Dis3L2 and the indicated Tailor or control (Mkg-p) constructs, and analyze by Western blotting. Input blots show the expression of the tagged proteins. Following HA-IP, Tailor and Tailor-CD are effectively co-IPed, whereas Zn finger mutant and  $\Delta$ DUF variants are poorly co-IPed. Tailor $\Delta$ tRNA is relatively unstable, and considering its relative total accumulation, its association with Dis3L2 is more substantial than with Zn and  $\Delta$ DUF mutants.

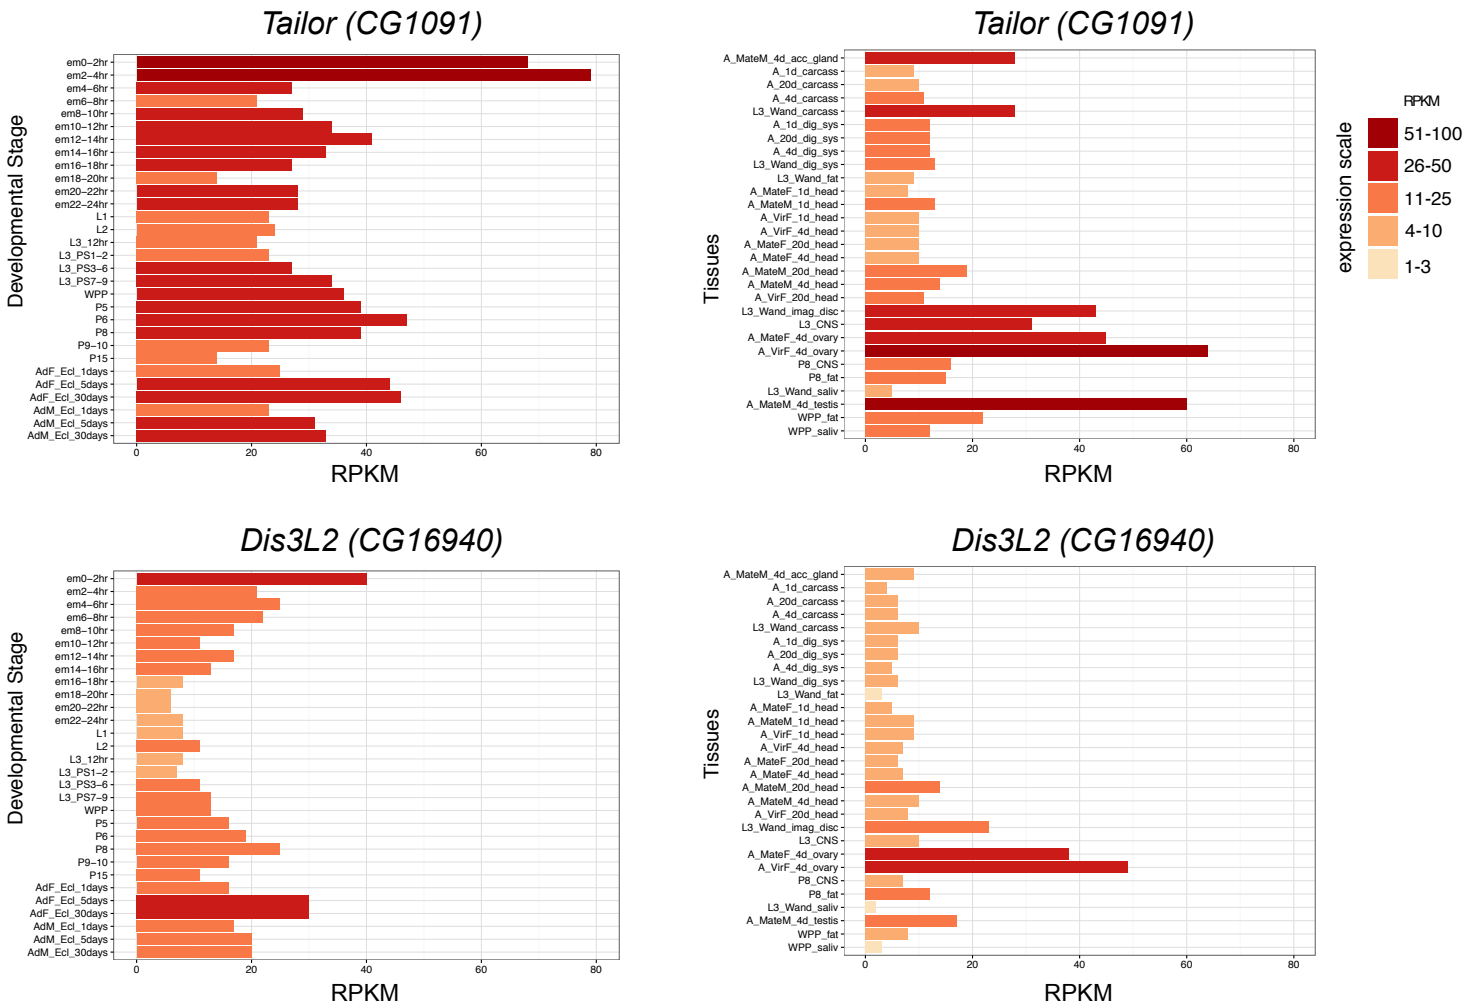

Figure S3. Developmental and tissue-specific expression of Tailor and Dis3L2.

Shown are summaries of modENCODE RNA-seq data for Tailor (CG1091) and Dis3L2 (CG16940) obtained from FlyBase ([www.flybase.org](http://www.flybase.org)). Both genes are broadly expressed, both temporally and spatially. Tailor is expressed at highest levels in adult ovary and testis, while Dis3L2 is highest expressed in ovaries. Consistent with this, both genes are also maternally deposited at a substantial level, compared to most other locations assessed.

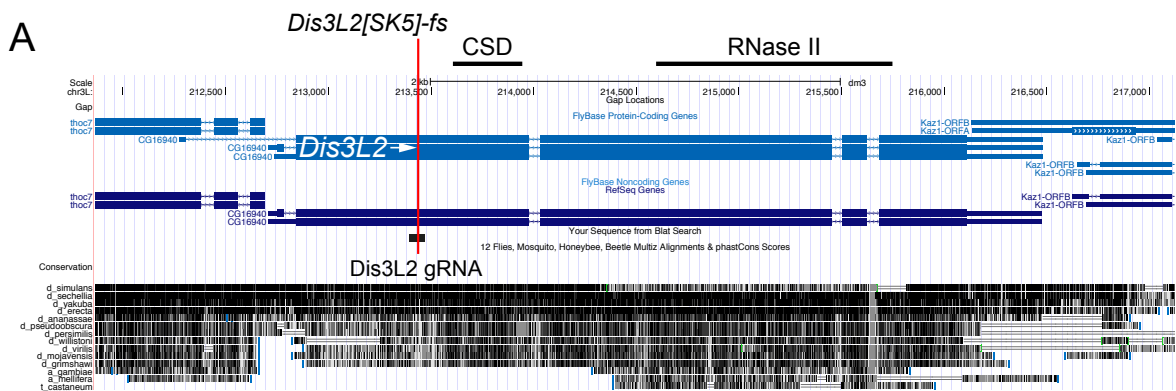

**B**

Dis3L2 (CG16940) alleles

```

WT      TCGAGTGGAGTCAGACCAGGTCAGGAAGCACATCCGCAACAGGTTGGTACCAGGGGCGGCATCGCCACGATTCTGAGGTC
#SK1   TCGAGTGGAGTCAGACCAGGatgtccagggttggttaccagggggacay-----GCCACGATTCTGAGGTC  -11
#SK2   TCGAGTGGAGTCAGACCAGGTCAGAAGCACATCCGCAACAGGTTGGTACCAGGGGCGGCATCGCCACGATTCTGAGGTC  0
#SK3   TCGAGTGGAGTCAGACCAGGTCAGAAGCACATCCG-----GTTGGTACCAGGGGCGGCATCGCCACGATTCTGAGGTC  -6
#SK4   TCGAGTGGAGTCAGACCAGGTCAGAAGCACATCCGCAca---TTGGTACCAGGGGCGGCATCGCCACGATTCTGAGGTC  -3
#SK5   TCGAGTGGAGTCAGACCAGGTCAGAAGCACATCCGC----GTTGGTACCAGGGGCGGCATCGCCACGATTCTGAGGTC  -4
#SK6   TCGAGTGGAGTCAGACCAGGTCAGAAGCACATCCGCAACAcaTTGGTACCAGGGGCGGCATCGCCACGATTCTGAGGTC  0
#SK7   TCGAGTGGAGTCAGACCAGGTCAGAAGCACATCCGCAACAGGTTGGTACCAGGGGCGGCATCGCCACGATTCTGAGGTC  0
#SK8   Irregular sequence

```

**C**

```

      E A H P Q Q V G Y Q G R H R H D S E V S A T N N G S H V Q Q Q P K L G
WT    GAAGCACATCCGCAACAGGTTGGTACCAGGGGCGGCATCGCCACGATTCTGAGGTCCTGTGCTACAAACAATGGAAGTCATGTACAGCAGCAACCGAAACTAGGA
#SK5  GAAGCACATCCGC---GGTTGGTTACCAGGGGCGGCATCGCCACGATTCTGAGGTCCTGTGCTACAAACAATGGAAGTCATGTACAGCAGCAACCGAAACTAGGA
      E A H P R L V T R G G I A T I L R S L L Q T Met E V Met Y S S N R N ***

```

Figure S4. CRISPR mutagenesis of *Drosophila* Dis3L2.

(A) Genomic region of Dis3L2, and location of a transgenic gRNA directed against an N-terminal region that is upstream of the known Dis3L2 domains. (B) Summary of candidate lines subjected to genotyping. These tests revealed the transgenic gRNA induced high efficiency mutations, including both in-frame and out-of-frame indels. (C) Dis3L2[SK5] allele was used for detailed characterization, and showed similar homozygous and hemizygous phenotypes, suggesting that it is a null allele.

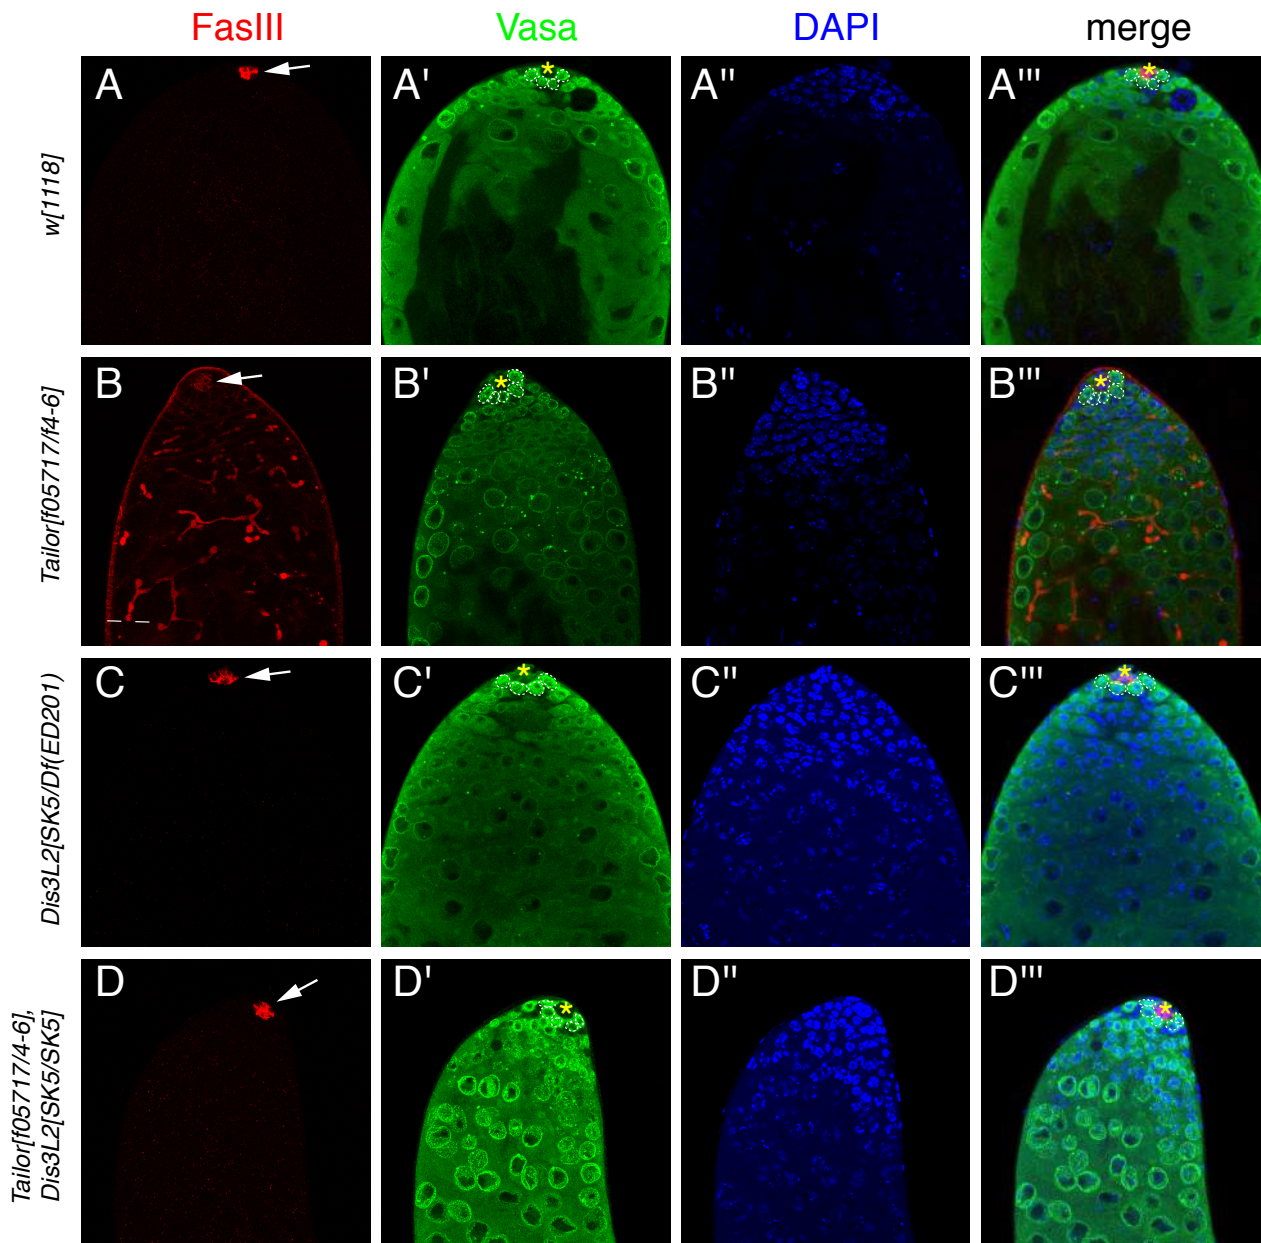

Figure S5. Analysis of germline stem cells in Tailor and Dis3L2 mutant testes.

Testes were dissected from five day old males and stained for Fas III (in red) to mark the somatic hub, the germline marker Vasa (in green), and the nuclear marker DAPI (in blue). Focusing on the germline stem cell (GSC) niche, the somatic hub is marked with arrows in A'-D', the GSCs that surround the hub are outlined with dotted circles in A''-D'' and directly contact the hub (asterisk). As in control *w[1118]* testis (A), Tailor transheterozygote mutant (B), Dis3L2 hemizygous mutant (C) and Tailor, Dis3L2 double mutant all exhibit a clear hub surrounded by an appropriate number of GSCs.

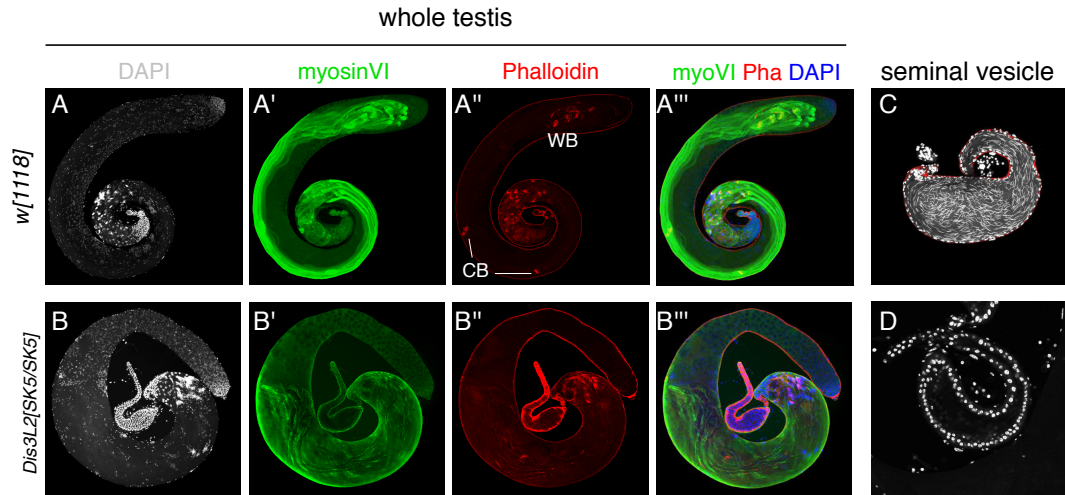

Figure S6. Testis defects of *Dis3L2[SK5]* homozygous mutants.

Shown are testis stainings for control *w<sup>[1118]</sup>* (top row) and *Dis3L2[SK5/SK5]* mutants. (A-B Staining of whole testes for DAPI (blue, shown in grayscale in single channel images), myosin VI (in green) and phalloidin (in red), and merged. (A) Control *w<sup>[1118]</sup>*; note that these images are the same as in main Figure 4. Panel A'' highlights cystic bulges (CB) and wastebags (WB) of the maturing meiotic products. (B) *Dis3L2* homozygous mutant completely lacks cystic bulges, and consequently produces no wastebags either. (C-D) Seminal vesicles, which are filled with mature sperm with needle-shaped DAPI labeled nuclei in control (C), whereas *Dis3L2* homozygote has a small seminal vesicle that is devoid of mature sperm (D).

### differentially expressed coding genes

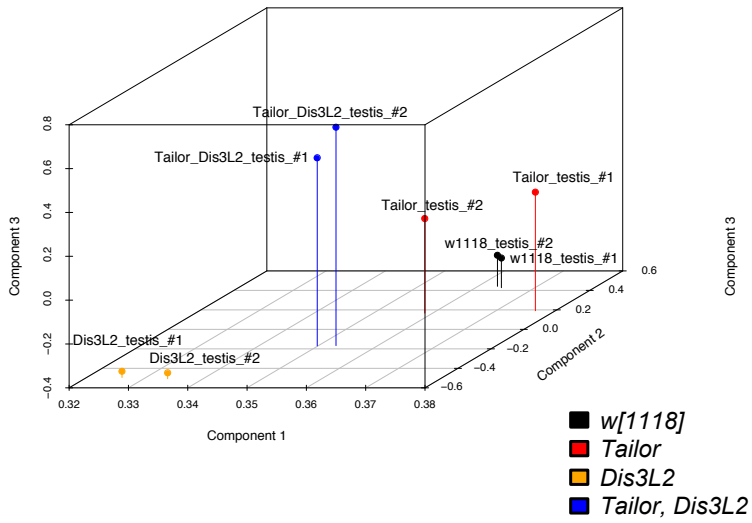

### differentially expressed lncRNAs

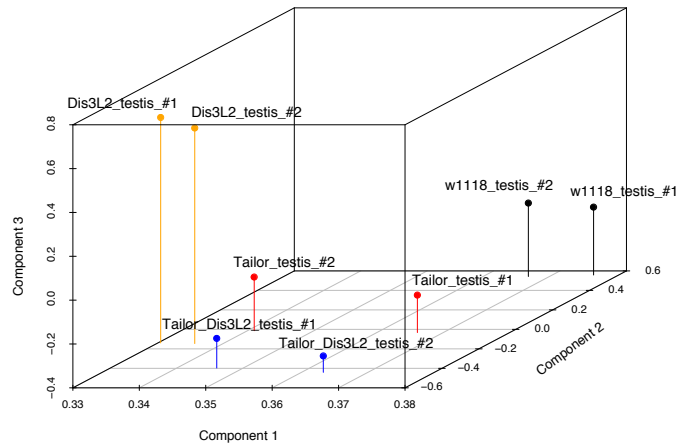

Figure S7. PCA analysis of Tailor, Dis3L2 and double mutant testes RNA-seq data

The left plot is based on protein-coding gene expression, while the right plot is based on lncRNA expression. In general, the replicate datasets are relatively closely related in the space, indicating the reproducibility of data from the various mutants.

Lin et al,  
Supplementary Figure 7



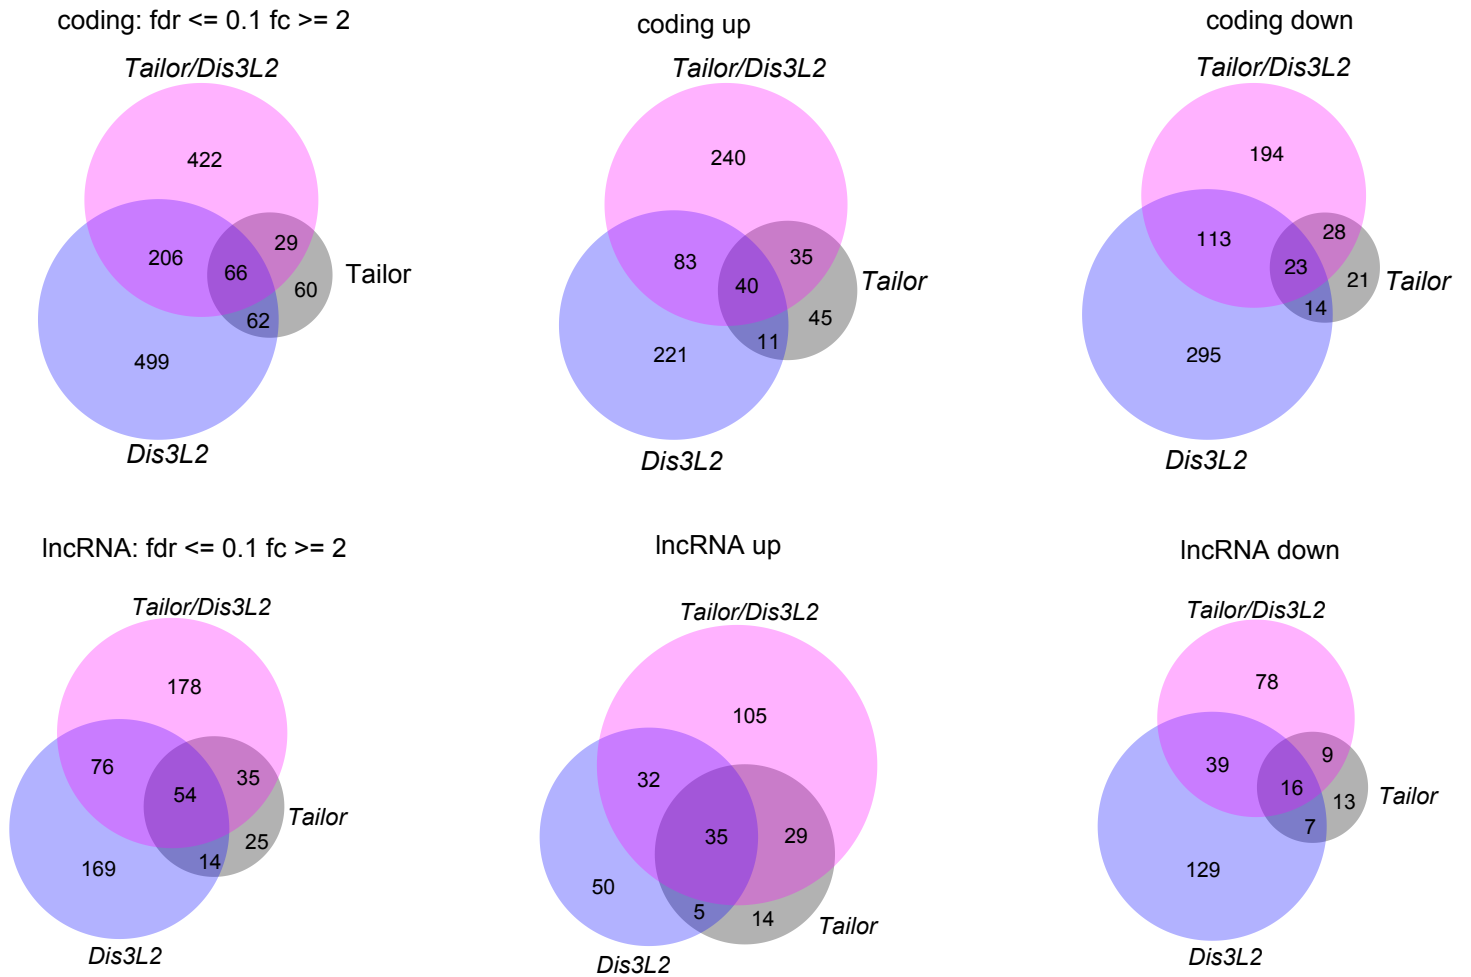

Figure S8. Venn diagrams summarizing shared changes amongst the Tailor and Dis3L2 mutant datasets. Gene expression changes were called at  $\geq 2$  fold change and  $\leq 0.1$  false discovery rate. The top row of Venn diagrams represents the numbers of protein-coding genes with shared differential expression amongst the indicated mutants, shown as all changes (left), upregulated genes (middle) and downregulated genes (right). The same is diagrammed in the bottom row of Venn diagrams for lncRNAs.

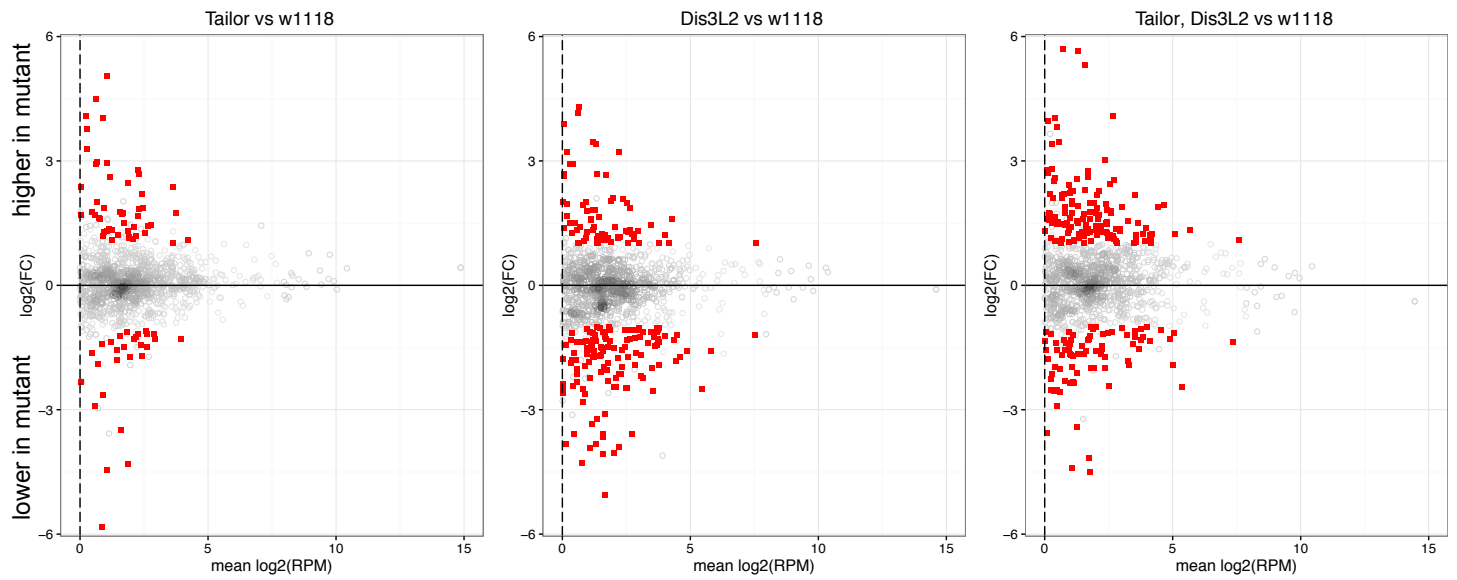

Figure S9. MA expression plots of lncRNA changes in Tailor, Dis3L2 and double mutant testis.

Biologically replicate RNA-seq datasets were made from each genotype. Red loci represent lncRNAs with  $FC \geq 2$  at an  $FDR \leq 0.1$ ; all other loci are in grey. Note that more genes are differentially expressed in Dis3L2 and the Tailor, Dis3L2 double mutant, compared to the Tailor mutant.

Figure S10. Heatmaps of lncRNA clusters that are coordinately upregulated in *Tailor*, *Dis3L2*, or double mutants.

dis3l2\_only : 50

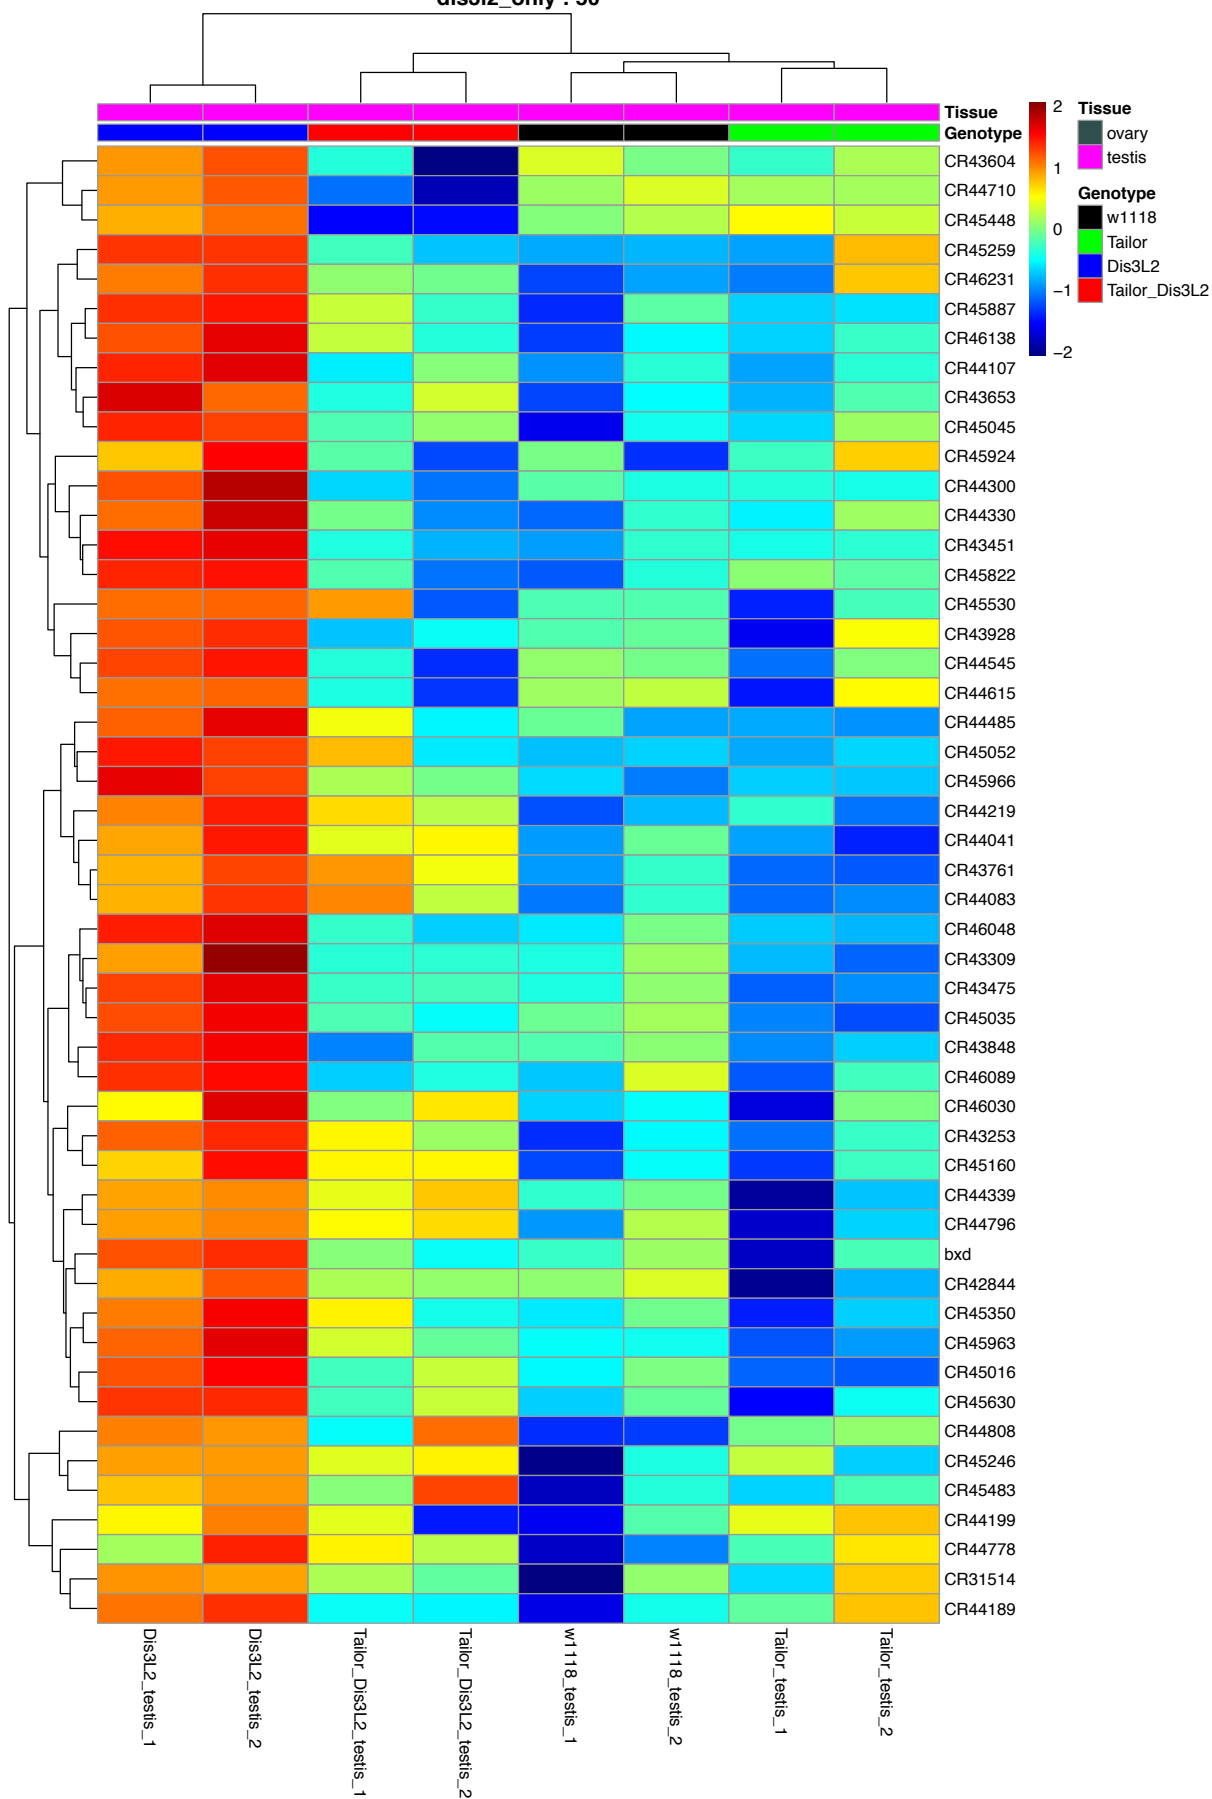

double mutant only: 105

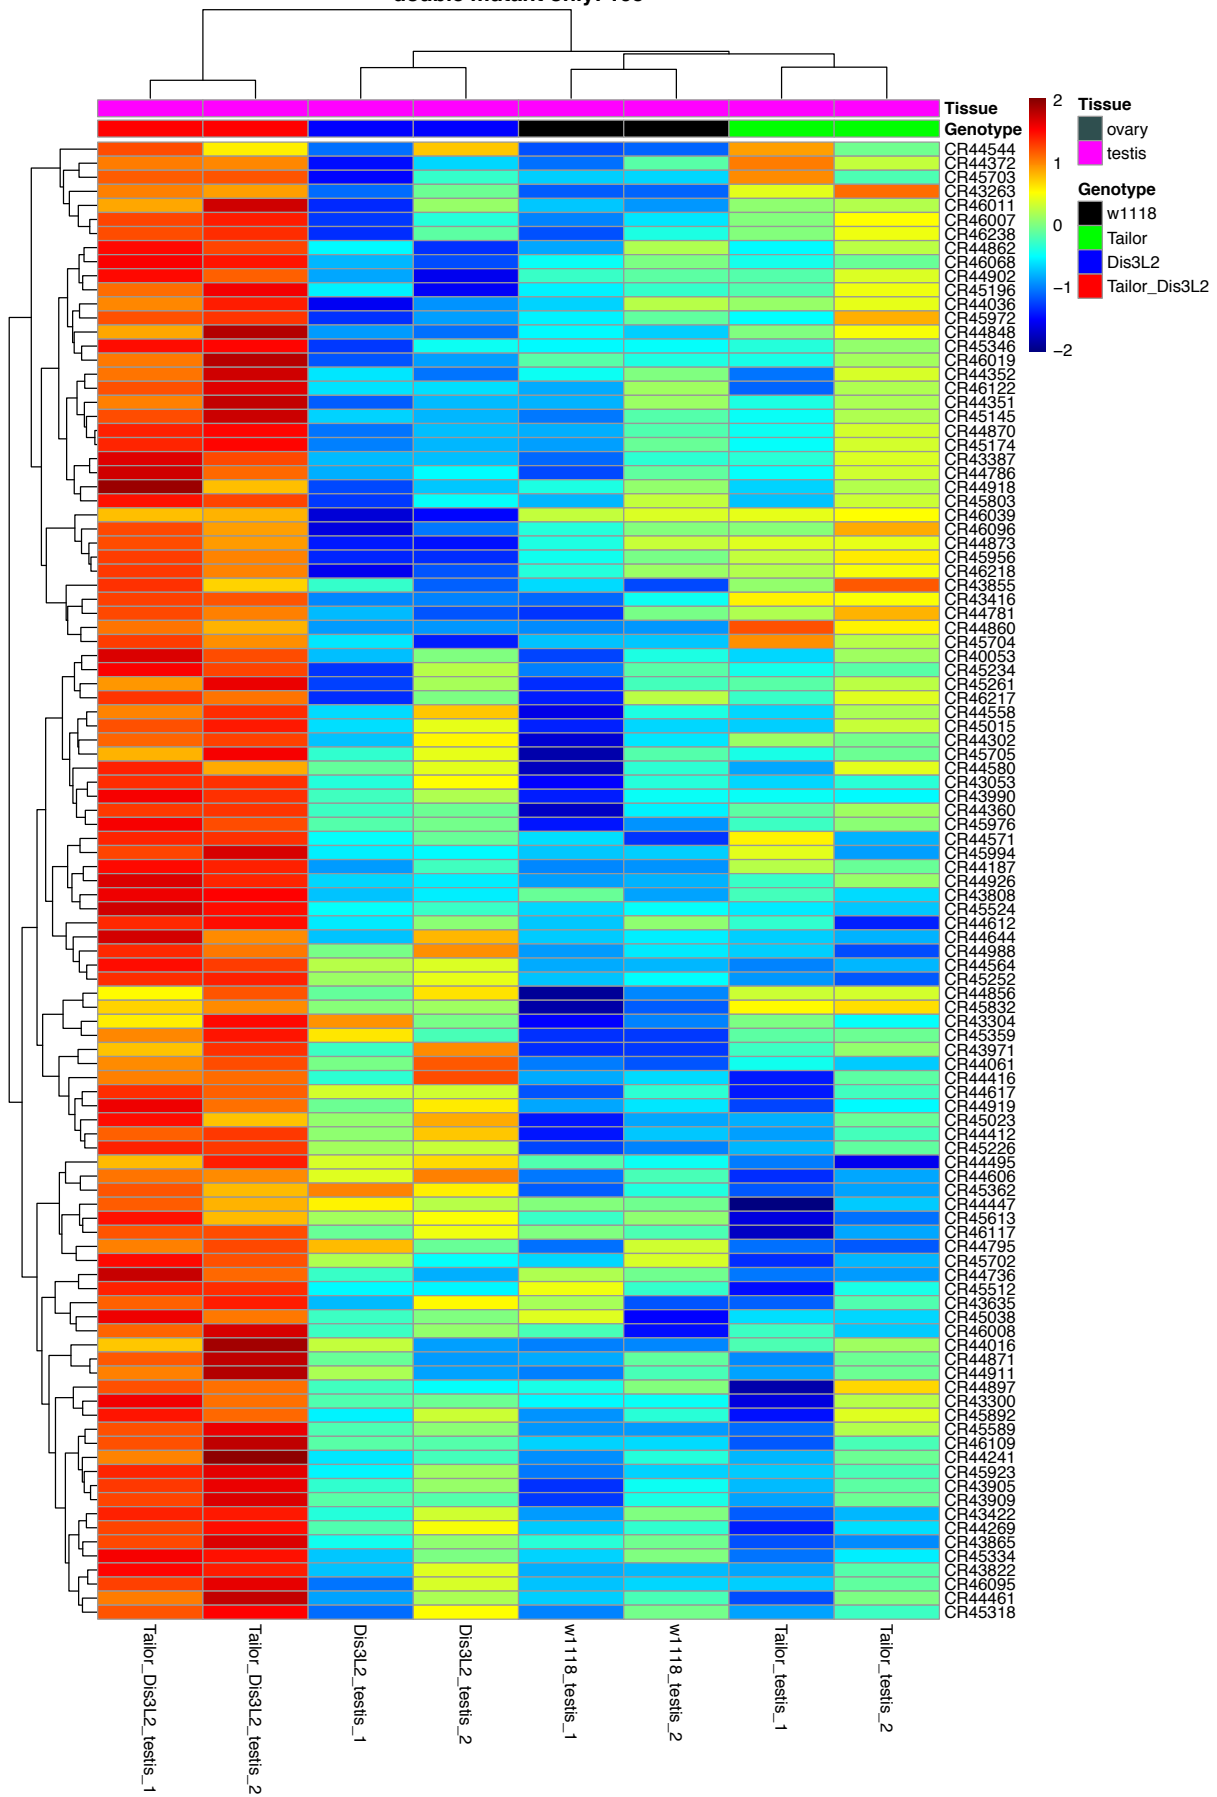

tailor\_double\_only: 29

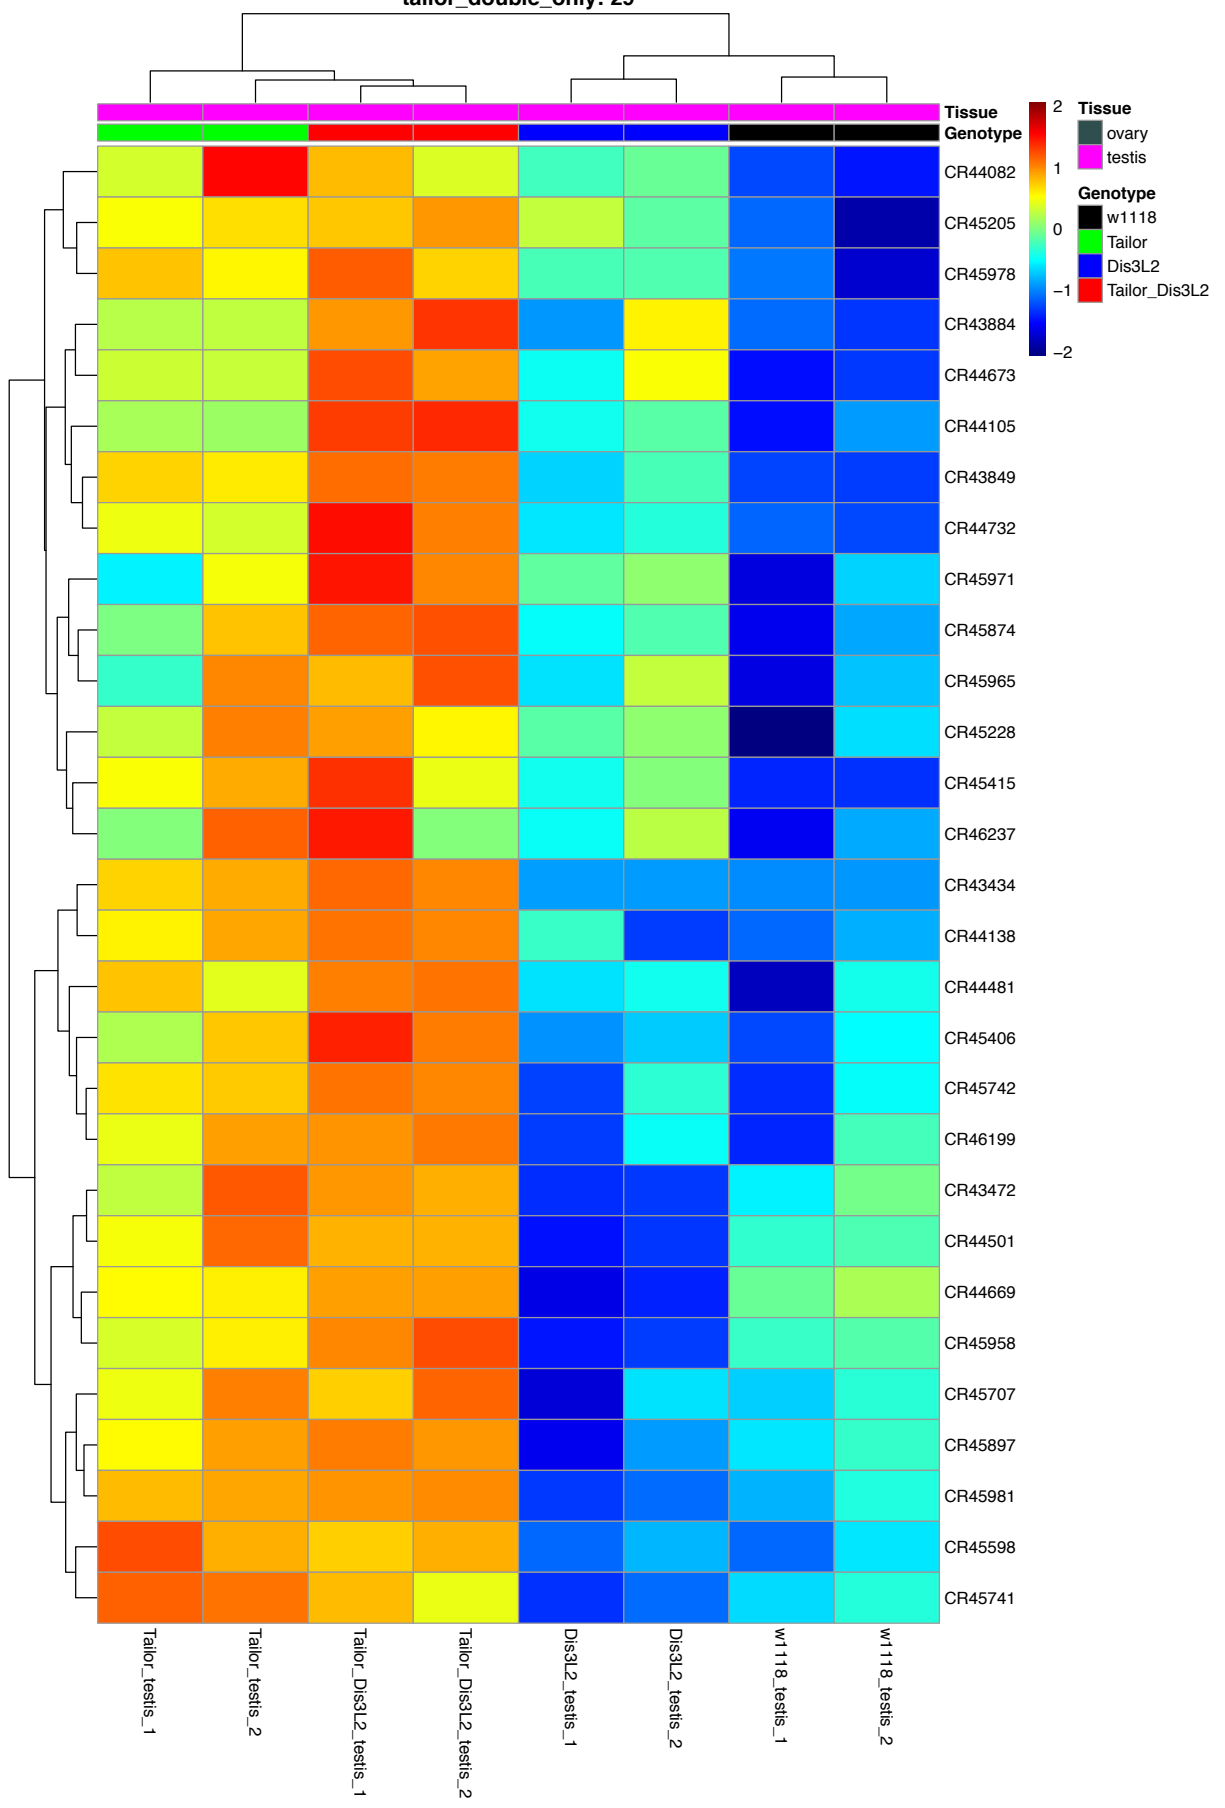

tailor\_only: 14

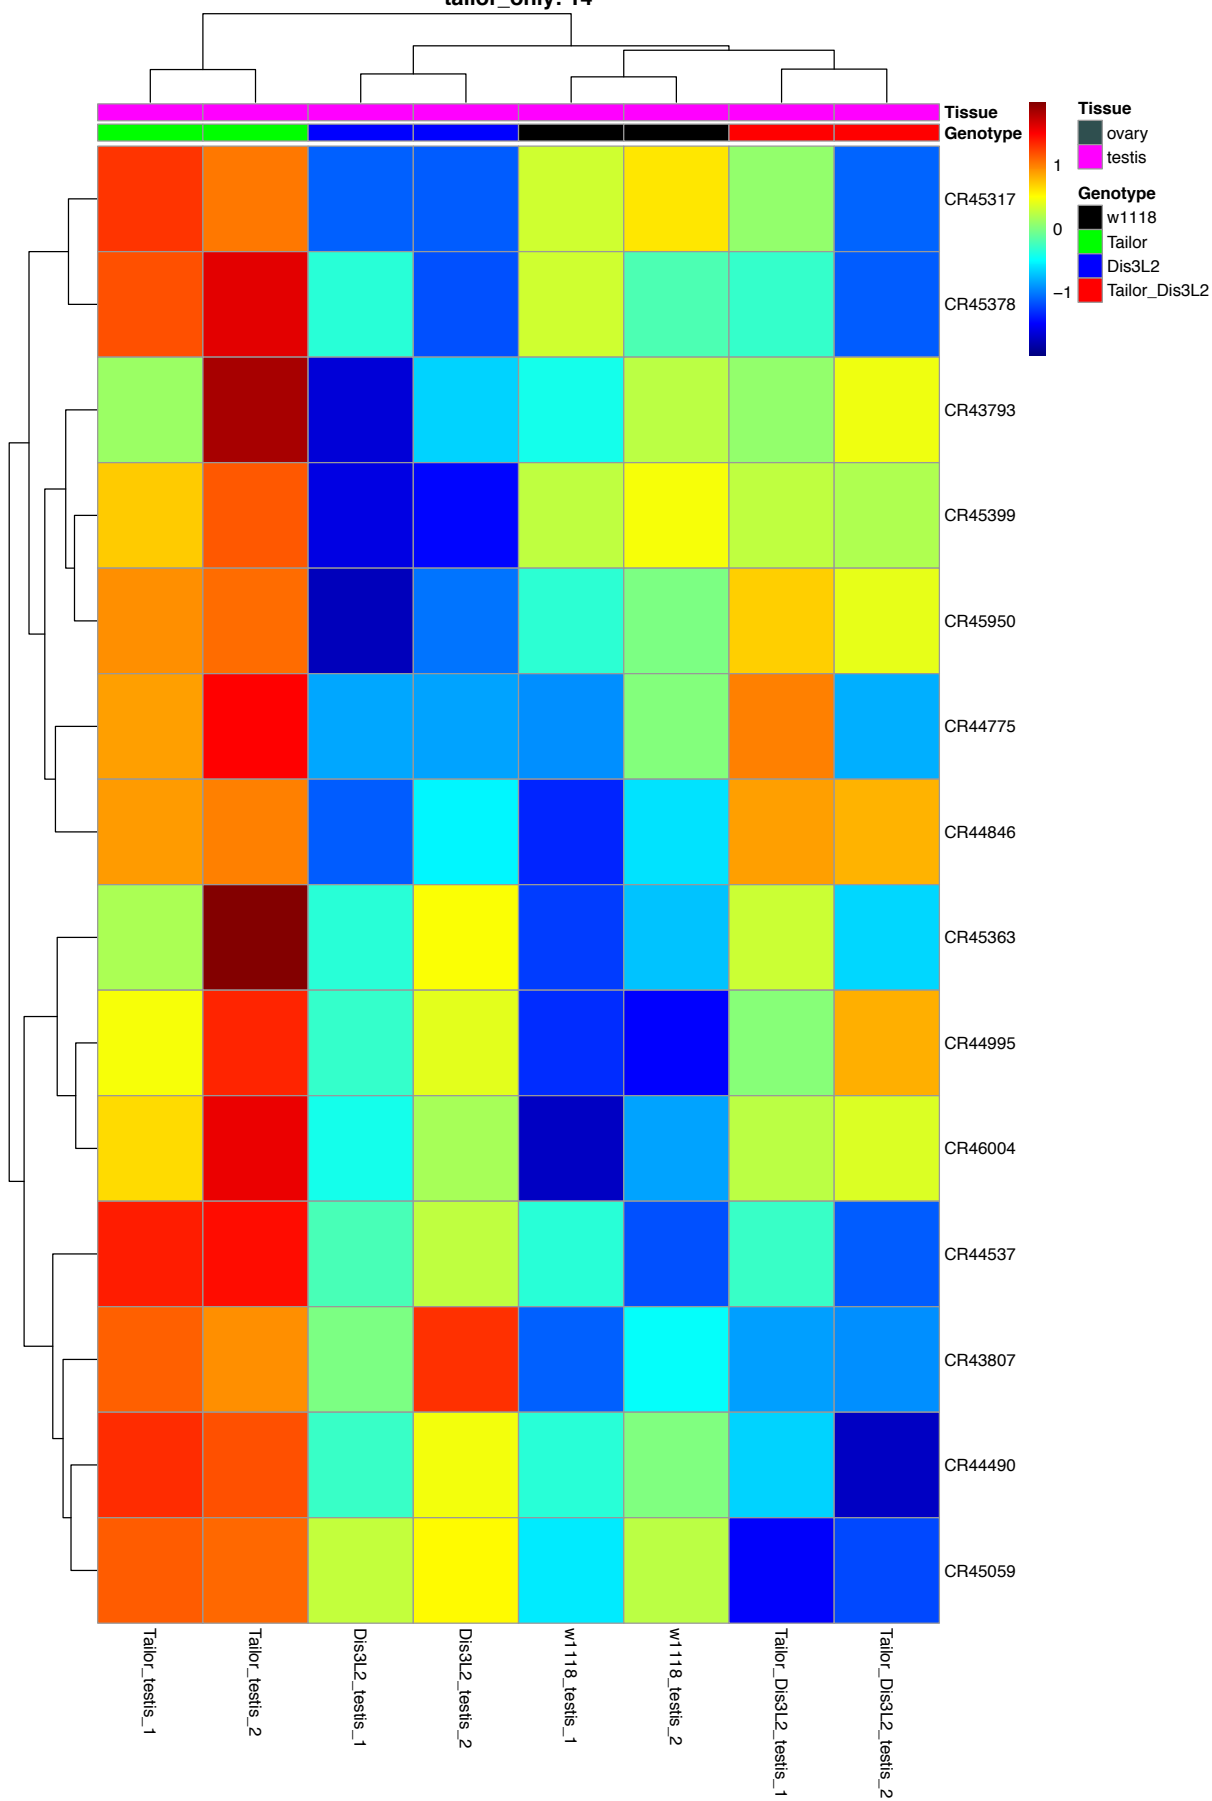





Table S2. Primer sequences for cloning and in vitro assays.

**Tailor mutants**

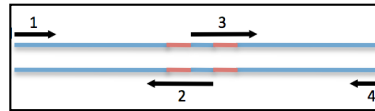

|                        |                                                                                         |
|------------------------|-----------------------------------------------------------------------------------------|
| Tailor A_1             | CACCATGGCCGAGATGATGCCAAAC                                                               |
| Tailor A_4             | TTAAAATGCATAGCGCTGACGC                                                                  |
| -Duf_fwd               | CACCATGCCGGGTGAGGGCGTGGCCTTC                                                            |
| -tRNANucl_rev          | TTATTTAGCTGGATCGAGCATTC                                                                 |
| C93-95A_3              | CATTCAGCGcTAGTTCCgcCAGCAACCCGCATAGTGGGCAC                                               |
| C93-95A_2              | GCGGTTGCTGgcGGAAGTAgcGCTGAATGTTGCTTTATTG                                                |
| G211A-S212A_3          | CTACAAGTTCCgCgCCCGCATCACAGGCATTGG                                                       |
| G211A-S212A_2          | GTGATGCGGGcCgCGAACTTGTAGACTCGCAGTG                                                      |
| D223A_3                | CGATCCTCGGcCCTGGACCTCTTCGTCGACATC                                                       |
| D223A_2                | GAGGTCCAGGgCCGAGGATCGATTTCCAATG                                                         |
| D223-225A_3            | CGATCCTCGGcCCTGGcCCTCTTCGTCGACATCGG                                                     |
| D223-225A_2            | GACGAAGAGGgCCAGGgCCGAGGATCGATTTCCAATG                                                   |
| H467A_3                | ACAACAAACgcCAATGTAACGAAAGCGGTGAC                                                        |
| H467A_2                | CGTTACATTGgcGTTTAGTTGTATGGGATCCTG                                                       |
| Dis3L2 constructs      |                                                                                         |
| 3xHA tagged dis3l2     |                                                                                         |
| CG16940 3xHA EcoRI Fwd | CCGAATTCATGTACCCATACGATGTTCCAGATTACGCTTATCCCTATGACGTCCC<br>GGACTATGCATATCCATATGACGTTCCA |
| CG16940 XbaI Rev       | GATTACGCTATGCCTTACCCTTTATATCCCGCCATA<br>GACTCTAGACTAAATTTGTTCTTCCATCTTT                 |
| pUAS-3xHA-dis3l2-CD    |                                                                                         |
| CG16940 D566A 569A Fwd | GATCCGATGACTGCTCGCGCTTTGGATGCCGCCGTTTCTATAGAGAAGC                                       |
| CG16940 D566A 569A Rev | GCTTCTCTATAGAAACGGCGGCATCCAAAGCGCGAGCAGTCATCGGATC                                       |
| Dis3L2 gRNA construct  |                                                                                         |
| CG16940-F              | CTTC GAAGCACATCCGCAACAGGT                                                               |
| CG16940-R              | AAAC ACCTGTTGCGGATGTGCTTC                                                               |
